# Supplementary material for: Surgical decision making in premenopausal BRCA carriers considering risk-reducing early salpingectomy or salpingo-oophorectomy: a qualitative study
Source: HighWire-hosted journal article supplement (doi:10.1136/jmedgenet-2020-107501), 2021-02-10
Supplement: jmedgenet-2020-107501supp001_data_supplement.pdf [file jmedgenet-2020-107501supp001_data_supplement.pdf]

### Supplementary material 1: Topic Guide for Qualitative Semi-Structured In-depth Interviews

- Introduce self, research study funded by Barts Charity and Rosetrees Trust.
- Purpose of the research.
- Introduce audio recorder.
- Stress all identifiable information will be kept confidential, but anonymised quotes may be published/presented.

- Family composition  
*Q: Who lives at home? Tell me about your relationships?*  
*P: Partner, children, parents, siblings, ages*
- Support network  
*Q: Tell me about people who are important to you that give you support/advice when you need it.*  
*P: Friends, family, support groups, religion*
- Occupation  
*Q: How would you describe your occupation?*  
*P: Full time, part time, paid, unpaid*
- Hobbies  
*Q: How do you fill your spare time? What do you do in your spare time?*
- How she found out she had a genetic mutation/was found to be at increased risk of ovarian/breast cancer.  
*Q: How did you find out that your chances of developing ovarian/breast cancer was higher than others?*  
*P: How long she has known*
- Effect on individual and family members.  
*Q: How did you take that news? How did your family take that news?*  
*P: Partner, children, extended family, psychological*
- Change in lifestyle choices since finding out she is at increased risk of ovarian/breast cancer.  
*Q: What lifestyle changes have you made, if any, since finding out you carry a faulty gene/are at increased risk of developing ovarian cancer? What has changed?*  
*P: smoking, drinking, exercise, diet, vitamins, herbal/complementary therapy*
- Reason(s) for change in lifestyle choices.  
*Q: Why do you think you made changes?*  
*P: Family, friends, cultural expectations*
- Importance of health to the individual.  
*Q: How important is being healthy to you?*
- Motivations for staying healthy.  
*Q: What motivates you to stay healthy? Why is it important?*  
*P: Family, friends, duty to self, cultural expectations*
- Previous knowledge of RRESO/RRSO/RRM/combined surgery.  
*Q: Were you aware of the different types of surgery available to reduce ovarian cancer/breast cancer risk? Where did you get your information from?*  
*P: health professionals, reading, attending support group events*
- Initial thoughts on hearing about RRESO/RRSO/RRM.  
*Q: What were your initial thoughts on hearing about this? Why did you feel this way?*
- Reasons RRESO/RRSO/RRM/combined surgery acceptable  
*Q: Why do you think you chose to have RRESO/RRSO/RRM +/- reconstruction/no surgery?*  
*P: fertility, premature menopause, surgical risk, ovarian/breast cancer risk reduction, ovarian/breast cancer worry, femininity, self-esteem,*

- Q: What are your thoughts on combining both ovarian and breast cancer surgery in a single operation?*  
*P: practicality of combined surgery, psychological impact, post-op recovery*
- Reasons RRESDO/RRSO/RRM not acceptable  
*Q: Talk me through why RRESDO/RRSO/ RRM +/- reconstruction/no surgery was not the right decision for you.*  
*P: fertility, premature menopause, surgical risk, ovarian/breast cancer risk reduction, ovarian/breast cancer worry*
  - Does acceptability change with age  
*Q: How might your decision have been different if you were older/younger?*
  - Reaction of family/friends in relation to her having surgery/no surgery.
  - Surgery timing for individuals not choosing surgery at present  
*Q: Do you think you may consider surgery in the future to reduce your risk of getting ovarian/breast cancer?*  
*P: When, type of surgery, if no surgery why*
  - Ease of coming to a decision  
*Q: How easy was it to come to a decision?*  
*P: what made it easy/difficult*
  - Satisfaction with decision  
*Q: How satisfied/happy are you with your decision?*  
*P: Why satisfied/not satisfied*
  - Likelihood of future regret  
*Q: How do you think you will feel about your decision in a few months/years? Are there any circumstances which may make you regret your decision?*  
*P: reasons for regret*
- Overall satisfaction with the counselling process prior to making decision to have/not have risk reducing surgery for ovarian/breast cancer prevention.  
*Q: Overall how satisfied are you with the counselling/information/support you received from health professionals before you made your decision?*  
*P: Did counselling help make a decision, why did it help, what else helped*
  - Areas for improvement.  
*Q: Is there anything the clinical team could have done better to help you make your decision? How would you improve the counselling that is provided?*
  - Advice she would give to someone trying to make a decision about risk reducing surgery for ovarian/breast cancer prevention.
  - *Q: What advice would you give to someone faced with having to make a similar choice as yourself?*

Final steps:

Thank the participant. Check whether they have remaining questions or comments about the topic  
 Reassurance about confidentiality and anonymity  
 PROTECTOR contact details should they want further information

RRSO – risk reducing salpingo-oophorectomy; RRESDO – risk reducing early salpingectomy with delayed oophorectomy; RRM – risk reducing mastectomy
